# Supplementary material for: Quantification of Choroidal Vascular Hyperpermeability on Ultra-Widefield Indocyanine Green Angiography in Macular Neovascularization
Source: MDPI journal article supplement (doi:10.3390/diagnostics14070754), 2024-04-02
Supplement: s1 [file s1]

## Supplementary Materials

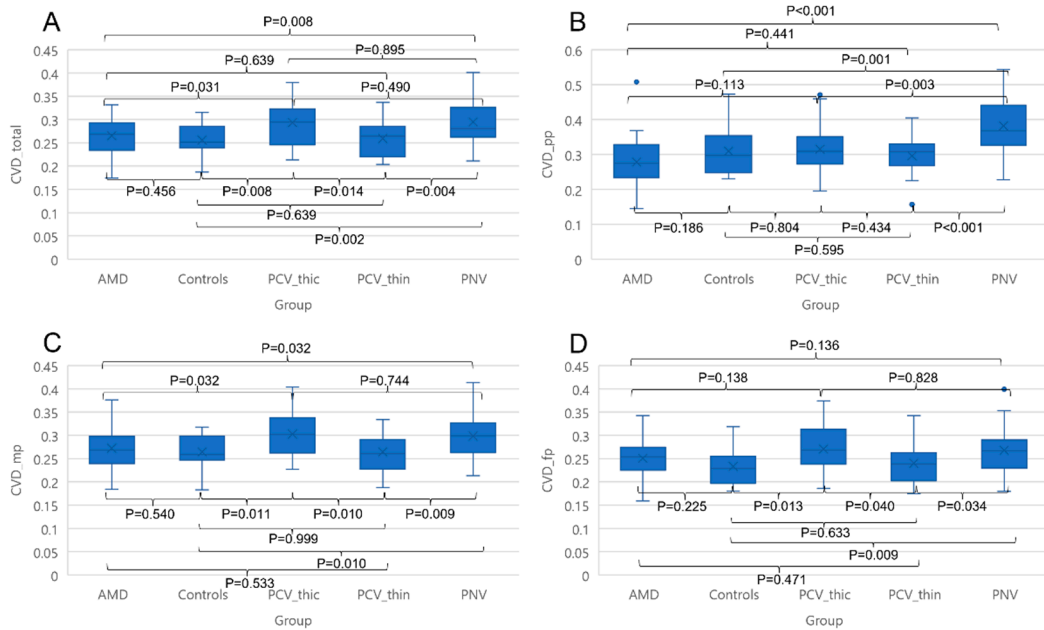

**Figure S1.** Choroidal vascular density (CVD) measured on ultra-widefield indocyanine green angiography (UWICGA) images by group. CVD on UWICGA images of the total gradable area (A), posterior pole (PP) area (B), mid-periphery (MP) (C), and far-periphery (FP) (D). UWICGA images of the total gradable area, PP, and MP revealed higher CVH values in PNV and thick-choroid PCV patients compared to other groups.

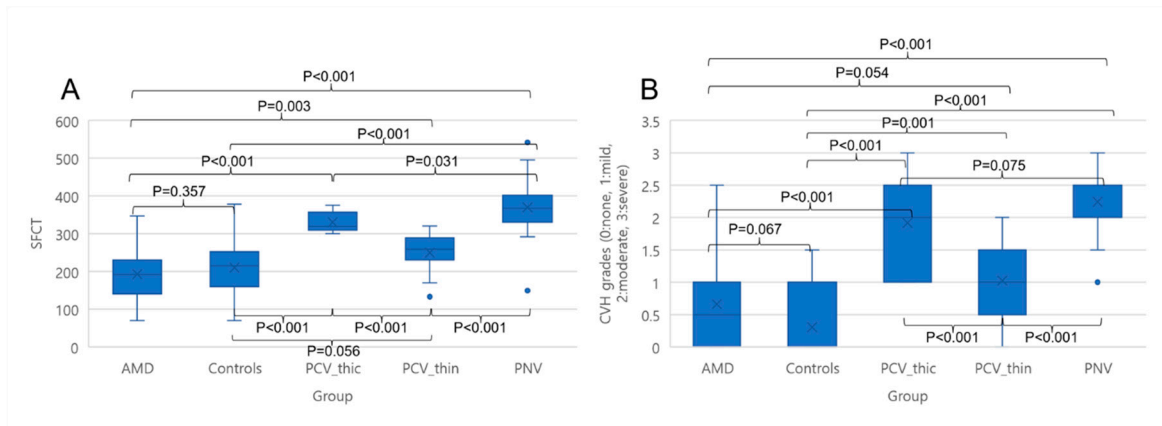

**Figure S2.** Subfoveal choroidal thickness (SFCT) and subjective choroidal vascular hyperpermeability (CVH) grades by group. (A) SFCT was highest in PNV patients followed by thick-choroid PCV, thin-choroid PCV, and nAMD patients. (B) Subjective CVH grades scored by 2 retina specialists were higher in thick-choroid PCV and PNV patients compared to the other groups.
